# Supplementary material for: Practical considerations for the electrochemical denitrification of real wastewater
Source: Royal Society of Chemistry journal article supplement (doi:10.1039/d2ew00346e), 2022-11-08
Supplement: d2ew00346e1.pdf [file d2ew00346e1.pdf]

## Supporting information for

# Practical Considerations for the Electrochemical Denitrification of Real Wastewater

Dehui Li, Cheng Fu , Chan Wang and Qijun Song \*

Key Laboratory of Synthetic and Biological Colloids, Ministry of  
Education, School of Chemical and Material Engineering, Jiangnan  
University, 1800 Lihu Road, Wuxi, Jiangsu Province 214122, PR China

Corresponding Authors: Prof. Dr. Qijun Song

Email: [qsong@jiangnan.edu.cn](mailto:qsong@jiangnan.edu.cn) (Qijun Song)

## **Text S1 Reagents and calculation**

**Fig. S1 Effect of the current density on the  $\text{NO}_2^-$ -N.**

**Fig. S2 Effects of the electrical conductivity on the (a)  $\text{NO}_3^-$ -N reduction, (b)  $\text{NO}_2^-$ -N and (c)  $\text{NH}_4^+$ -N yield.**

**Fig. S3 Effects of initial pH on the (a)  $\text{NO}_3^-$ -N reduction, (b)  $\text{NO}_2^-$ -N and (c)  $\text{NH}_4^+$ -N yield, and (d) the change in pH throughout the experiments.**

**Fig. S4 Effect of  $\text{Cl}^-$  concentrations on the  $\text{NO}_2^-$ -N.**

**Fig. S5 Effects of the  $\text{PO}_4^{3-}$  concentration on the (a)  $\text{NO}_2^-$ -N and (b)  $\text{NH}_4^+$ -N yield.**

**Fig. S6 Effects of the  $\text{CO}_3^{2-}$  concentration on the (a)  $\text{NO}_3^-$ -N reduction, (b)  $\text{NO}_2^-$ -N yield and (c)  $\text{NH}_4^+$ -N yield.**

**Fig. S7 Effects of  $\text{Ca}^{2+}$  on the (a)  $\text{NO}_3^-$ -N reduction, (b)  $\text{NO}_2^-$ -N yield and (c)  $\text{NH}_4^+$ -N yield.**

**Fig. S8 Effects of COD on the (a)  $\text{NO}_2^-$ -N yield, (b)  $\text{NH}_4^+$ -N yield and (c) TN removal.**

**Fig. S9 (a)  $\text{NO}_2^-$ -N yield, (b)  $\text{NH}_4^+$ -N yield and (c) TN removal of simulated wastewater I and simulated wastewater II.**

**Fig. S10 Water sample (a) during and (b) after reaction.**

**Fig. S11 (a) The removal load of  $\text{NO}_3^-$ -N,  $\text{NO}_2^-$ -N,  $\text{NH}_4^+$ -N and TN and (b) the energy consumption in different cycle.**

**Table. S1. COD of solutions before and after reaction and removal load**

**Table. S2. Operating cost analysis**

## Text S1 Reagents and calculations

### Reagents

K<sub>2</sub>Cr<sub>2</sub>O<sub>7</sub>, H<sub>2</sub>SO<sub>4</sub>, KNO<sub>3</sub>, Na<sub>3</sub>PO<sub>4</sub>·12H<sub>2</sub>O, Na<sub>2</sub>CO<sub>3</sub>, CaCl<sub>2</sub>, Nessler reagent and N-(1-naphthyl)ethylenediamine dihydrochloride were purchased from Sinopharm Chemical Reagent Co., Ltd. Na<sub>2</sub>SO<sub>4</sub> and NaCl were purchased from Shanghai Titan Scientific Co., Ltd. K<sub>2</sub>S<sub>2</sub>O<sub>8</sub> was purchased from Thermo Fisher Scientific (China) Co., Ltd.

### Calculations of efficiency and energy consumption <sup>1</sup>

The NO<sub>3</sub><sup>-</sup>-N removal rate (R(NO<sub>3</sub><sup>-</sup>-N)), NO<sub>2</sub><sup>-</sup>-N generation rate (S(NO<sub>2</sub><sup>-</sup>-N)), NH<sub>4</sub><sup>+</sup>-N generation rate (S(NH<sub>4</sub><sup>+</sup>-N)) and TN removal efficiency (R(TN)) were calculated by the following equations,

$$R(\text{NO}_3^- \text{-N}) = [ (C(\text{NO}_3^- \text{-N})_0 - C(\text{NO}_3^- \text{-N})_t) / C(\text{NO}_3^- \text{-N})_0 ] \times 100\% \quad (\text{S1})$$

$$S(\text{NO}_2^- \text{-N}) = [ C(\text{NO}_2^- \text{-N})_t / C(\text{NO}_3^- \text{-N})_0 ] \times 100\% \quad (\text{S2})$$

$$S(\text{NH}_4^+ \text{-N}) = [ C(\text{NH}_4^+ \text{-N})_t / C(\text{NO}_3^- \text{-N})_0 ] \times 100\% \quad (\text{S3})$$

$$R(\text{TN}) = [(C(\text{TN})_0 - C(\text{TN})_t) / C(\text{TN})_0] \times 100\% \quad (\text{S4})$$

$$dC(\text{NO}_3^- \text{-N})_t / dt = -kC(\text{NO}_3^- \text{-N})_t \quad (\text{S5})$$

where C(TN)<sub>0</sub> and C(NO<sub>3</sub><sup>-</sup>-N)<sub>0</sub> (mg/L) are the initial concentration of NO<sub>3</sub><sup>-</sup>-N, C(NO<sub>3</sub><sup>-</sup>-N)<sub>t</sub>, C(NO<sub>2</sub><sup>-</sup>-N)<sub>t</sub> and C(NH<sub>4</sub><sup>+</sup>-N)<sub>t</sub> (mg/L) are the concentrations of NO<sub>3</sub><sup>-</sup>-N, NO<sub>2</sub><sup>-</sup>-N and NH<sub>4</sub><sup>+</sup>-N at time t, k (min<sup>-1</sup>) is the pseudo-first-order reaction rate constant.

Electro energy utilization efficiency (φ) of the reaction products (NH<sub>4</sub><sup>+</sup>-N, NO<sub>2</sub><sup>-</sup>-N and N<sub>2</sub>) is determined by the expression,

$$\varphi = [(Q(\text{NO}_2^- \text{-N})_t + Q(\text{N}_2 \text{-N})_t + Q(\text{NH}_4^+ \text{-N})_t)] / Q_t \times 100\% \quad (\text{S6})$$

$$Q_t = JSt / 1000 \quad (\text{S7})$$

$$Q(\text{NO}_2\text{-N})_t = 2 \times [C(\text{NO}_2\text{-N})_t \times V/M_N] \times F \quad (\text{S8})$$

$$Q(\text{N}_2\text{-N})_t = 5 \times [(C(\text{NO}_3\text{-N})_0 - C(\text{NO}_3\text{-N})_t - C(\text{NO}_2\text{-N})_t - C(\text{NH}_4^+\text{-N})_t) \times V/M_N] \times F \quad (\text{S9})$$

$$Q(\text{NH}_4^+\text{-N})_t = 8 \times [C(\text{NH}_4^+\text{-N})_t \times V/M_N] \times F \quad (\text{S10})$$

$Q_t$  (C) is the total electric quantity that provide at time  $t$  (s);  $J$  (mA/cm<sup>2</sup>) is the current density;  $S$  (cm<sup>2</sup>) is the area of cathode;  $Q(\text{NO}_2\text{-N})_t$ ,  $Q(\text{N}_2\text{-N})_t$  and  $Q(\text{NH}_4^+\text{-N})_t$  are the electric quantities that cost during  $\text{NO}_3\text{-N}$  reduction to  $\text{NO}_2\text{-N}$ ,  $\text{N}_2\text{-N}$  and  $\text{NH}_4^+\text{-N}$  at time  $t$ ;  $C(\text{NO}_3\text{-N})_0$  (mg/L) is the initial concentration of  $\text{NO}_3\text{-N}$ ;  $C(\text{NO}_3\text{-N})_t$ ,  $C(\text{NO}_2\text{-N})_t$  and  $C(\text{NH}_4^+\text{-N})_t$  (mg/L) are the concentrations of  $\text{NO}_3\text{-N}$ ,  $\text{NO}_2\text{-N}$  and  $\text{NH}_4^+\text{-N}$  at time  $t$ ;  $V$  is the volume of solution,  $M_N$  is the molar mass of N (14000 mg/mol) and  $F$  is the Faraday's constant (96487 C/mol)

Energy consumption ( $\varphi$ , kWh/kgTN) is determined by the expression,

$$\varphi = 1000 \cdot IV_{ap}t / [(C(\text{TN})_0 - C(\text{TN})_t)V_r] \quad (\text{S11})$$

$I$  is the current density (A),  $V_{ap}$  is applied voltage (V),  $t$  is electrolysis time (h),  $C(\text{TN})_0$  is the TN concentration (mg/L) and  $V_r$  is working cell volume (L).

### Calculations of DFT

The DFT calculations were performed with the Vienna ab initio simulation package (VASP).<sup>2</sup> The Perdew–Burke–Ernzerhof functional (PBE) of generalized gradient approximation functional (GGA) was used for the electronic exchange and correlation effects. The adsorption models were simulated in a vacuum layer of 20 Å in the  $Z$ -direction. The reciprocal space was sampled by Monkhorst-Pack scheme with  $3 \times 3 \times 1$  grids. The adsorbed models were free to move on all the directions during the calculation process. The energy tolerance of  $10^{-5}$  was set for planes self-consistency

electronic relaxation. All atoms were relaxed fully until the Hellmann-Feynmann force acting on each atom was less than 0.03 eV/Å. To describe the vdw interaction, the dispersion corrections DFT-D2 was employed in this work.

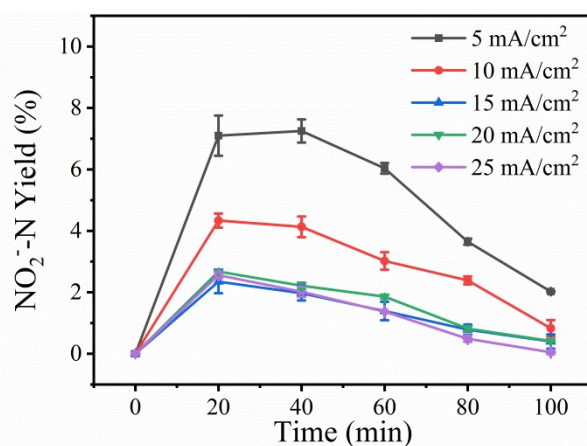

Fig. S1 Effect of the current density on the  $\text{NO}_2^-$ -N.

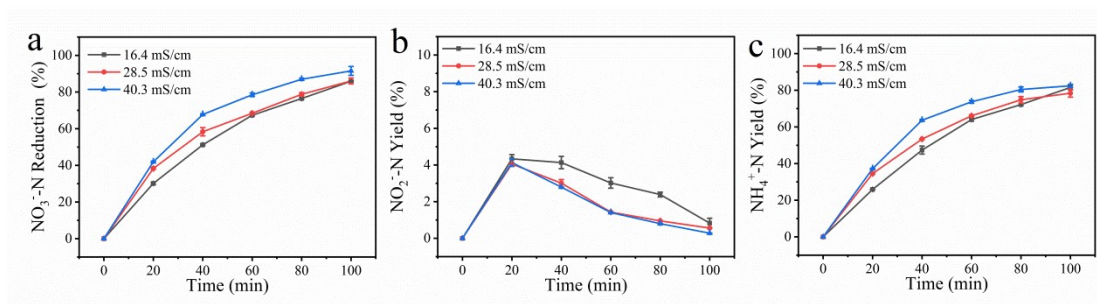

Fig. S2 Effects of the electrical conductivity on the (a)  $\text{NO}_3^-$ -N reduction, (b)  $\text{NO}_2^-$ -N and (c)  $\text{NH}_4^+$ -N yield.

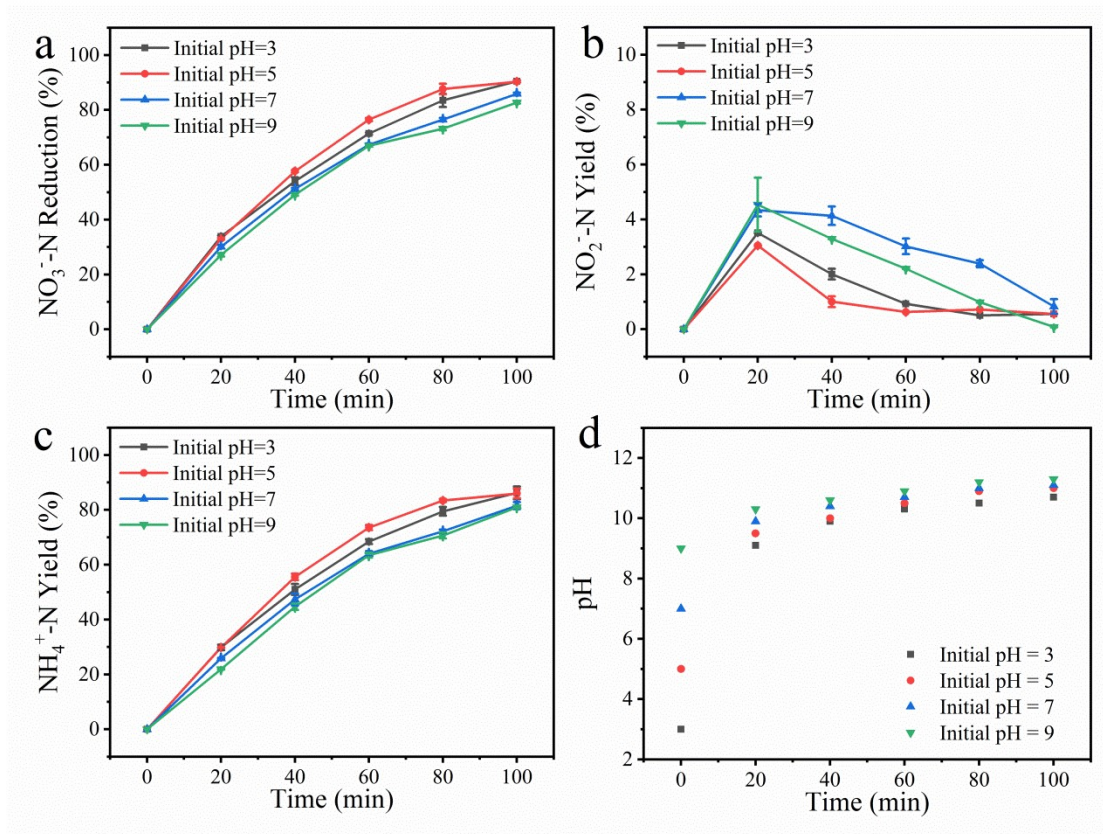

Fig. S3 Effects of initial pH on the (a) NO<sub>3</sub><sup>-</sup>-N reduction, (b) NO<sub>2</sub><sup>-</sup>-N and (c) NH<sub>4</sub><sup>+</sup>-N yield, and (d) the change in pH throughout the experiments.

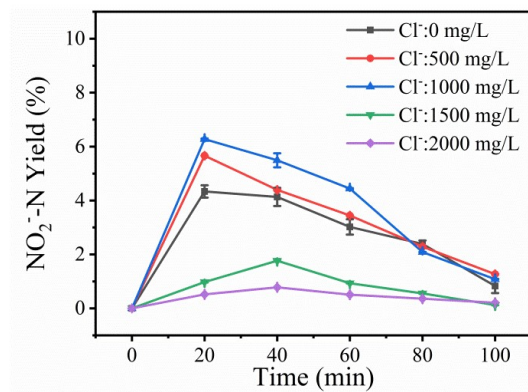

Fig. S4 Effect of Cl<sup>-</sup> concentrations on the NO<sub>2</sub><sup>-</sup>-N.

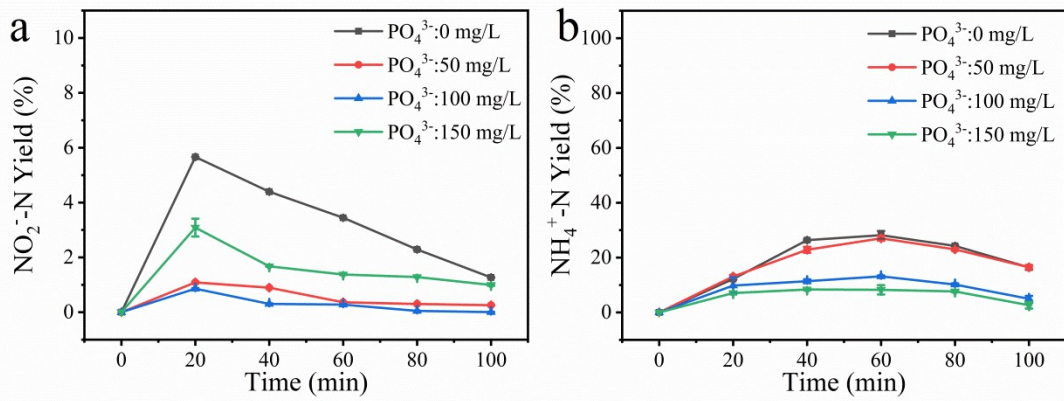

Fig. S5 Effects of the  $\text{PO}_4^{3-}$  concentration on the (a)  $\text{NO}_2^-$ -N and (b)  $\text{NH}_4^+$ -N yield.

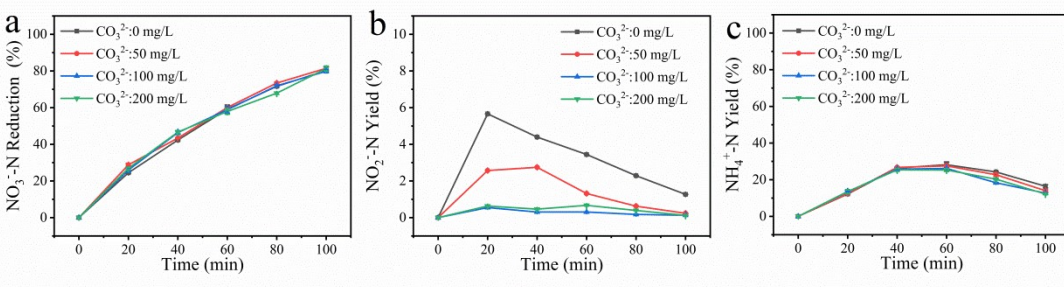

Fig. S6 Effects of the  $\text{CO}_3^{2-}$  concentration on the (a)  $\text{NO}_3^-$ -N reduction, (b)  $\text{NO}_2^-$ -N yield and (c)  $\text{NH}_4^+$ -N yield.

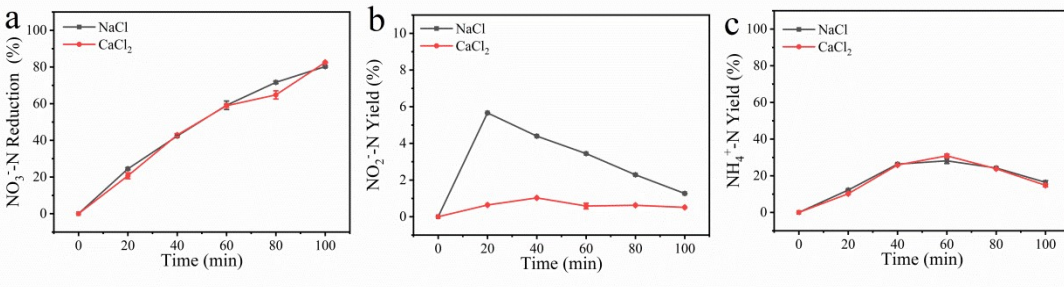

Fig. S7 Effects of  $\text{Ca}^{2+}$  on the (a)  $\text{NO}_3^-$ -N reduction, (b)  $\text{NO}_2^-$ -N yield and (c)  $\text{NH}_4^+$ -N yield.

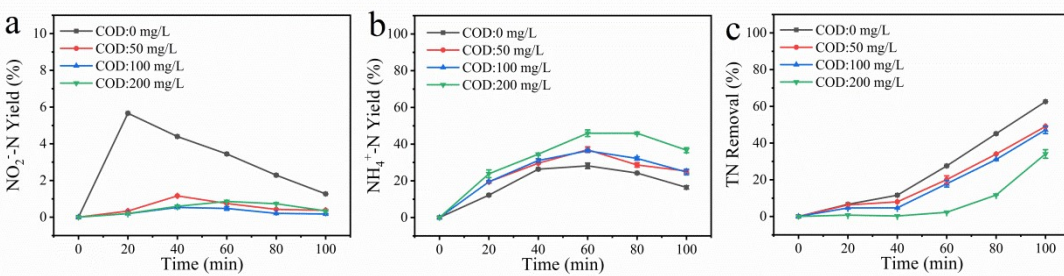

Fig. S8 Effects of COD on the (a)  $\text{NO}_2^-$ -N yield, (b)  $\text{NH}_4^+$ -N yield and (c) TN removal.

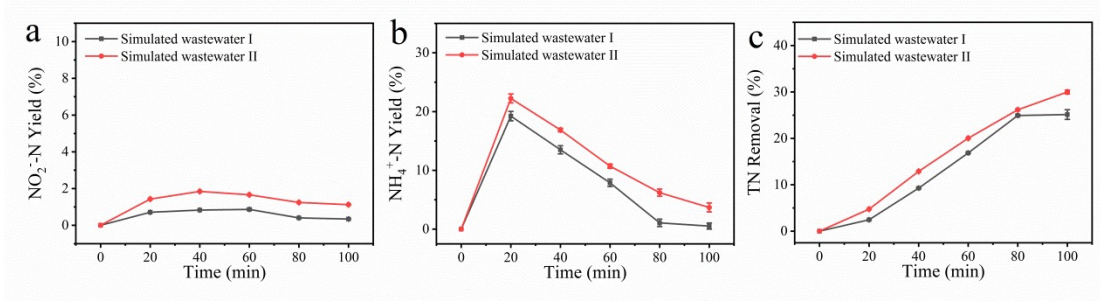

Fig. S9 (a)  $\text{NO}_2^-$ -N yield, (b)  $\text{NH}_4^+$ -N yield and (c) TN removal of simulated wastewater I and simulated wastewater II

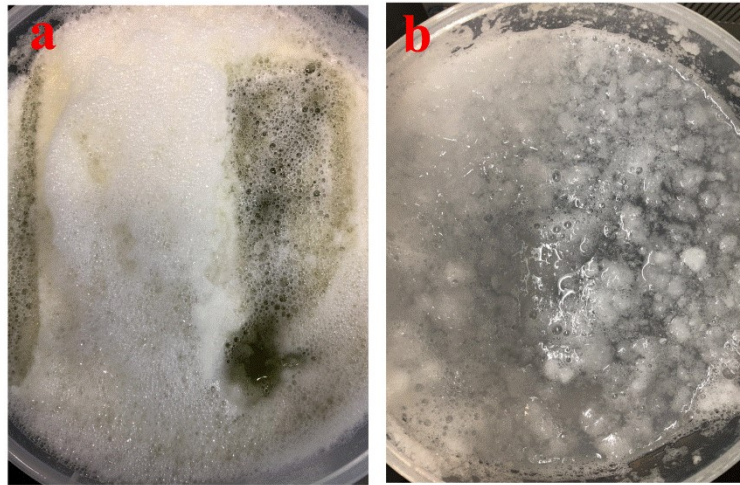

Fig. S10 Water sample (a) during and (b) after reaction.

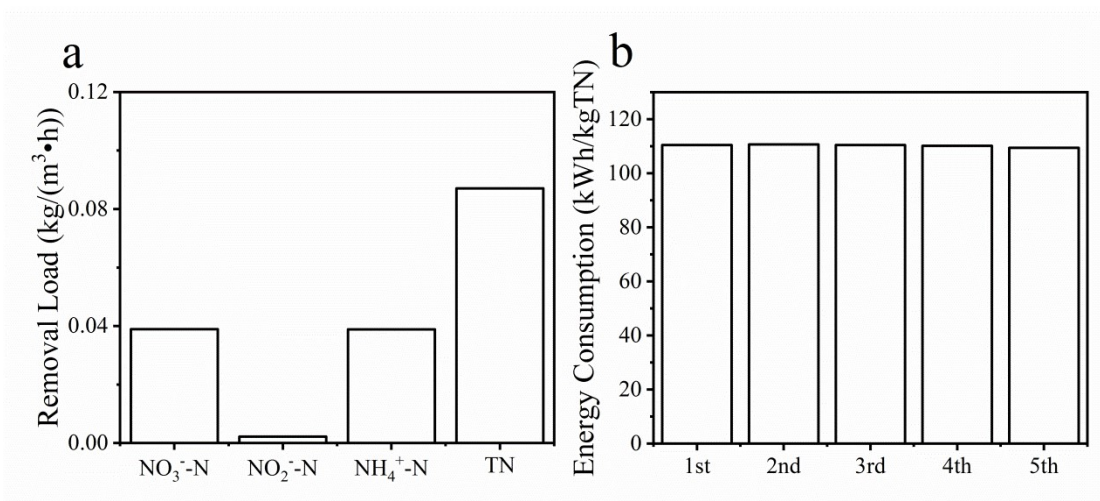

Fig. S11 (a) The removal load of  $\text{NO}_3^-$ -N,  $\text{NO}_2^-$ -N,  $\text{NH}_4^+$ -N and TN, and (b) the energy consumption in different cycle.



**Table. S1. COD of solutions before and after reaction and removal load**

| Items                                     | COD of solutions     |                      |                      |
|-------------------------------------------|----------------------|----------------------|----------------------|
| Before reaction (mg/L)                    | 50                   | 100                  | 200                  |
| After reaction (mg/L)                     | 42.9                 | 87.3                 | 185.6                |
| COD removal load (kg/(m <sup>3</sup> ·h)) | 4.3×10 <sup>-3</sup> | 7.6×10 <sup>-3</sup> | 8.6×10 <sup>-3</sup> |

**Table. S2. Operating cost for real water treatment\***

| Items                                       | Quantitative estimation                                     | Total cost/\$ |
|---------------------------------------------|-------------------------------------------------------------|---------------|
| Ti/IrO <sub>2</sub> -RuO <sub>2</sub> anode | 39.225 \$ × 2 ÷ 1000                                        | 0.079         |
| brass cathode                               | 0.925 \$ × 2 ÷ 1000                                         | 0.002         |
| DC power supply                             | 0.024 kW × 6 h × (1 T ÷ 1.2 g/mL ÷ 2.5 L) × 0.093 \$/(kW·h) | 4.464         |
| mechanic stirrer                            | 0.008 kW × 6 h × (1 T ÷ 1.2 g/mL ÷ 2.5 L) × 0.093 \$/(kW·h) | 1.488         |

\*The density of real wastewater is 1.2 mg/mL. The cell voltage between electrodes was 6.0 V when the current density was 10 mA/cm<sup>2</sup>.

$$\text{TN Removal amount} = 564.5 \text{ mg/L} - 42.3 \text{ mg/L} = 522.2 \text{ mg/L} = 522.2 \text{ g/T}$$

$$\text{Total cost of 1 T wastewater} = (0.079 \$ + 0.002 \$ + 4.464 \$ + 1.488 \$) \div 522.2 \text{ g} = 0.012 \text{ \$/g}_{\text{TN}}$$

## Notes and references

1. L. Su, K. Li, H. Zhang, M. Fan, D. Ying, T. Sun, Y. Wang and J. Jia, Electrochemical nitrate reduction by using a novel Co<sub>3</sub>O<sub>4</sub>/Ti cathode, *Water Res*, 2017, **120**, 1-11.
2. G. Kresse and J. Furthmüller, Efficient iterative schemes for ab initio total-energy calculations using a plane-wave basis set, *Physical Review B*, 1996, **54**, 11169-11186.
